# Supplementary material for: An Experimental Study on Uplift Capacity of Axisymmetric Plate Anchors in Well Graded Sand at Different Relative Density and Embedment Ratio
Source: Research Square preprint supplement (doi:10.21203/rs.3.rs-1648256/v1), 2022-06-07
Supplement: Supplementary file 1 [file 9356a5b52d5e27a1e09f5b6a.xlsx]

## Sheet: Proposed angle
				Proposed Failure Angle From Peak Uplift Load
	Φ, °	Dry unit weight, γ (kN/m3)	Embedment Depth,H (m)	Plate Size, D	θ(°)	B1	B2	Volume (m3)	Dead Weight (kN)	θavg
	41.28	17.73	0.3	0.15	28.2105	0.471858	0.15	0.0315929	0.560142	27.0844
			0.45		23.64	0.543671		0.0599444	1.05
			0.6		29.4027	0.826239		0.165822	2.94002
	46.45	18.15	0.3		31.558	0.518516		0.0369136	0.669983	29.8376
			0.45		27.1607	0.611757		0.0732766	1.32997
			0.6		30.794	0.865172		0.18016	3.2699
	41.28	17.73	0.3	0.3	22.9995	0.554679	0.3	0.0564072	1.0001	23.7883
			0.45		21.9995	0.663614		0.10942	1.94002
			0.6		26.3658	0.894793		0.231819	4.11014
	46.45	18.15	0.3		27.3002	0.609685		0.0644622	1.16999	26.6384
			0.45		24.068	0.701986		0.119007	2.15998
			0.6		28.5471	0.952824		0.256744	4.65991
	EQUATIONS
	FOR 15 m PLATE		θ = 0.55 Φ + 4.43
	FOR 30 m PLATE		θ = 0.55 Φ + 1.03
							0.0279836
